# Supplementary material for: How Should I Study for the Exam? Self-Regulated Learning Strategies and Achievement in Introductory Biology
Source: Atypon-hosted journal article supplement (doi:10.1187/cbe.16-09-0269), 2017-05-12
Supplement: combinedsupmats.pdf [file combinedsupmats.pdf]

# Supplemental Material

*CBE—Life Sciences Education*

Sebesta and Speth

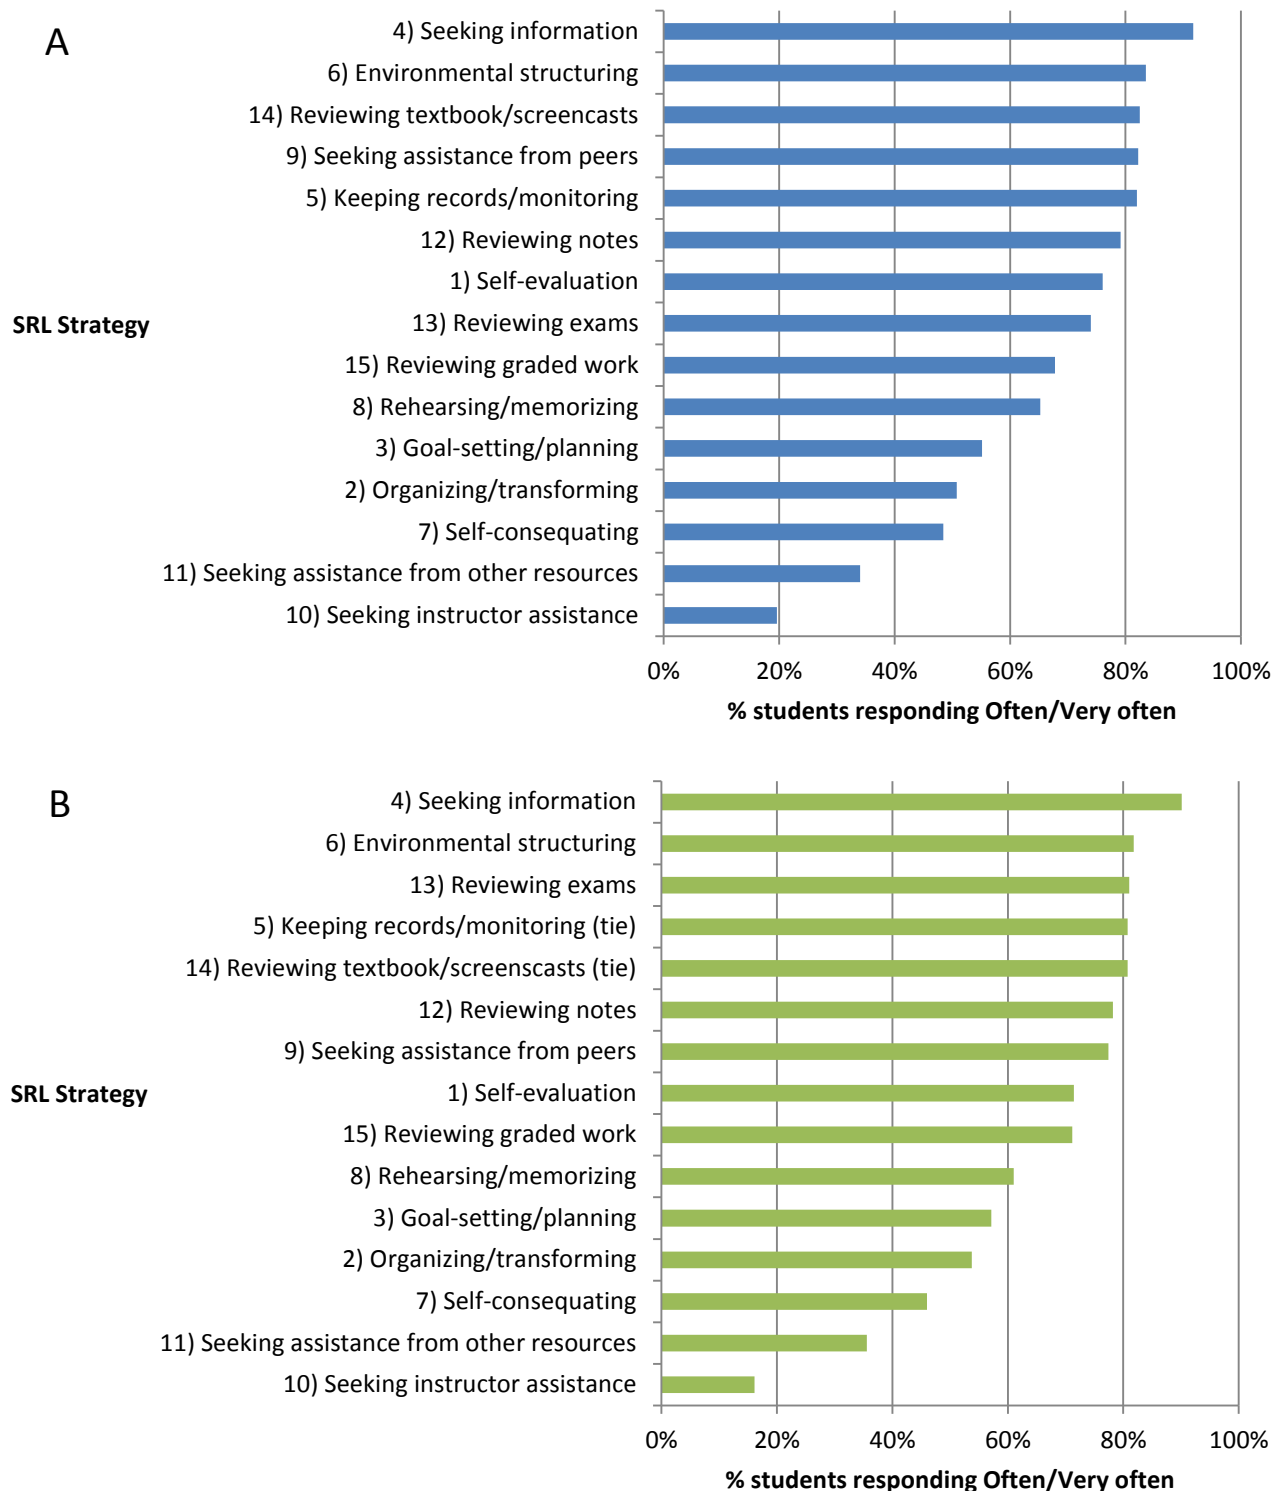

**Figure S1.** Ranking of SRL strategies, from most used to least used when studying for Exam 1 (A) and Exam 2 (B), based on the relative proportion of students reporting “Often” or “Very often” on the respective surveys. Strategy rankings are the same across time except for “Reviewing exams,” which rose from 8<sup>th</sup> to 3<sup>rd</sup> from Exam 1 to Exam 2.
